# Supplementary material for: Synergistic carrier and phonon transport advance Ag dynamically-doped n-type PbTe thermoelectrics via Mn alloying
Source: Royal Society of Chemistry journal article supplement (doi:10.1039/d3ta06594d), 2023-11-28
Supplement: d3ta06594d1.pdf [file d3ta06594d1.pdf]

## Supplementary Information

### **Synergistic carrier and phonon transport advance Ag dynamically-doped *n*-type PbTe thermoelectrics via Mn alloying**

Wei Yuan, ‡<sup>a</sup> Qian Deng, ‡<sup>a</sup> Dong Pan, <sup>b</sup> Xiang An, <sup>a</sup> Canyang Zhao, <sup>a</sup> Wenjun Su, <sup>a</sup> Zhengmin He, <sup>a</sup> Qiang Sun\*<sup>c,d</sup> and Ran Ang\*<sup>a,e</sup>

<sup>a</sup> Key Laboratory of Radiation Physics and Technology, Ministry of Education, Institute of Nuclear Science and Technology, Sichuan University, Chengdu 610064, China

<sup>b</sup> State Key Laboratory of Superlattices and Microstructures, Institute of Semiconductors, Chinese Academy of Sciences, P.O. Box 912, Beijing 100083, China

<sup>c</sup> State Key Laboratory of Oral Diseases, National Clinical Research Center for Oral Diseases, West China Hospital of Stomatology, Sichuan University, Chengdu, Sichuan 610041, China

<sup>d</sup> Sichuan Provincial Engineering Research Center of Oral Biomaterials, Chengdu, Sichuan 610041, China

<sup>e</sup> Institute of New Energy and Low-Carbon Technology, Sichuan University, Chengdu 610065, China

‡ W. Yuan and Q. Deng contributed equally to this work.

\*Corresponding authors and Emails: [rang@scu.edu.cn](mailto:rang@scu.edu.cn) (RA), [qiangsun@scu.edu.cn](mailto:qiangsun@scu.edu.cn)

[\(QS\)](#)

## 1. Computational details

### 1.1 Single parabolic band model

The Pisarenko curves and the effective mass of  $n$ -type PbTe can be modeled by the single parabolic band (SPB) model, and the SPB model is based on the following equations:<sup>1</sup>

Seebeck coefficient:

$$S = \pm \frac{k_B}{e} \left( \frac{(r + 5/2)F_{r+2/3}(\eta)}{(r + 3/2)F_{r+1/2}(\eta)} - \eta \right) \quad (\text{eq. S1})$$

Hall carrier concentration:

$$n_H = 4\pi \left[ \frac{2m^* k_B T}{h^2} \right]^{3/2} F_{1/2} \quad (\text{eq. S2})$$

Lorenz number:

$$L = \frac{k_B^2 3F_0 F_2 - 4F_1^2}{e^2 F_0^2} \quad (\text{eq. S3})$$

where  $k_B$  is the Boltzmann constant,  $\hbar$  is the reduce Planck constant,  $\eta$  is the reduced Fermi level, and  $r$  denotes the scattering factor and equals  $-1/2$  here assuming that the acoustic scattering mechanism dominates. The Fermi integral is given by:

$$F_n(\eta) = \int_0^{\infty} \frac{x^n}{1 + e^{x-\eta}} dx \quad (\text{eq. S4})$$

### 1.2 Single Kane band model

The thermoelectric-transport properties of  $n$ -type PbTe can be modeled by adopting the single Kane band (SKB) model. The transport coefficients are determined by the equations as follows:<sup>2, 3</sup>

Hall carrier concentration:

$$n_H = \frac{1}{eR_H} = A^{-1} \frac{N_V (2m_b^* k_B T)^{3/2}}{3\pi^2 \hbar^3} {}_0F_0^{3/2} \quad (\text{eq. S5})$$

Hall factor:

$$A = \frac{3K(K+2) {}_0F_{-4}^{1/20} F_0^{3/2}}{(2K+1)^2 ({}_0F_{-2}^1)^2} \quad (\text{eq. S6})$$

Hall Carrier mobility:

$$\mu_H = A \frac{2\pi\hbar^4 e C_l}{m_l^* (2m_b^* k_B T)^{3/2} E_{def}^2 {}^0F_{-2}^1} \quad (\text{eq. S7})$$

Power factor:

$$PF = \frac{2N_V \hbar k_B^2 C_l}{\pi E_{def}^2 m_l^*} \left( \frac{{}^1F_{-2}^1}{{}^0F_{-2}^1} - \xi \right) {}^{20}F_{-2}^1 \quad (\text{eq. S8})$$

${}^nF_k^m$  has a similar form as the Fermi integral:

$${}^nF_k^m = \int_0^\infty \left( -\frac{\partial f}{\partial \varepsilon} \right) \varepsilon^n (\varepsilon + \alpha \varepsilon^2)^m [(1 + 2\alpha \varepsilon)^2 + 2]^{k/2} d\varepsilon \quad (\text{eq. S9})$$

Where  $\zeta$  is the reduced chemical potential,  $N_V$  is the band degeneracy ( $N_V=4$  for *n*-type PbTe),<sup>4</sup>  $K$  is the band anisotropy ( $K=3.6$  for *n*-type PbTe),<sup>5</sup>  $k_B$  is the Boltzmann constant,  $\hbar$  is the reduce Planck constant,  $m_l^*$  is the inertial mass ( $m_l^* = 3m_d^* / (N_V^{2/3} (2K^{1/3} + K^{-2/3}))$ ),<sup>6</sup>  $C_l$  is the longitudinal elastic ( $C_l=7.1 \times 10^{10}$  Pa for *n*-type PbTe),<sup>7, 8</sup>  $\varepsilon$  is the reduced energy of electronic state,  $\alpha$  is the reciprocal reduced band gap ( $\alpha = k_B T / E_g$ ),  $E_g$  is the band gap,  $E_g = 0.18 eV + 0.0004 eV/K \times T$ ,  $E_{def}$  is the deformation potential coefficient.

### 1.3 Calculation of lattice thermal conductivity $\kappa_{lat}$

The lattice thermal conductivity ( $\kappa_{lat}$ ) of the  $\text{Ag}_{0.03}\text{Pb}_{1-x}\text{Mn}_x\text{Te}$  samples was calculated by the modified Debye-Callaway model, which can be expressed by:

$$\kappa_{lat} = \frac{k_B}{2\pi^2 v} \left( \frac{k_B}{\hbar} \right)^3 \int_0^{\Theta/T} \tau_{tot}(x) \frac{x^4 e^x}{(e^x - 1)^2} dx \quad (\text{eq. S10})$$

Here,  $v = 3^{1/3} (v_l^{-3} + 2v_t^{-3})^{-1/3}$  is the average speed of phonon,  $v_l$  and  $v_t$  denote the longitudinal and transverse speeds of sound respectively,  $\hbar$  is the reduced Planck constant,  $\Theta$  is the Debye temperature,  $x$  is the relation of  $\hbar\omega/k_B T$ ,  $\omega$  is the phonon frequency, and  $\tau_{tot}$  is the total phonon scattering relaxation time. The total phonon relaxation time  $\tau_{tot}$  for the  $\text{Ag}_{0.03}\text{Pb}_{1-x}\text{Mn}_x\text{Te}$  samples consists of Umklapp process, normal process, point defects, grain boundary, and nanoprecipitates (U+N+PD+GB+NP) by the following equation:<sup>9</sup>

$$\tau_{tot}^{-1} = \tau_U^{-1} + \tau_N^{-1} + \tau_{PD}^{-1} + \tau_{GB}^{-1} + \tau_{NP}^{-1} \quad (\text{eq. S11})$$

The phonon scattering relaxation time for respective mechanism can be expressed as follows:

Umklapp phonon scattering:

$$\tau_U^{-1} = A_N * \frac{2 k_B \bar{V}^{1/3} \omega^2 \gamma^2 T}{(6\pi^2)^{\frac{1}{3}} M v^3} \quad (\text{eq. S12})$$

Normal phonon scattering:

$$\tau_N^{-1} = \frac{2 K_B \bar{V}^{1/3} \omega^2 \gamma^2 T}{(6\pi^2)^{\frac{1}{3}} M v^3} \quad (\text{eq. S13})$$

Point defect scattering:

$$\tau_{PD}^{-1} = \frac{V \omega^4}{4\pi^3 v^3} * \sum (1-x_i) \left[ \left( \frac{M_i - M}{M} \right)^2 + \epsilon \left( \frac{a_i - a}{a} \right)^2 \right] \quad (\text{eq. S14})$$

Grain boundary scattering:

$$\tau_{GB}^{-1} = v/Gd \quad (\text{eq. S15})$$

Nanoprecipitates scattering:

$$\tau_{NP}^{-1} = v \left[ (2\pi R^2)^{-1} + \left( \frac{4}{9} \pi R^2 (\Delta D/D)^2 \left( \frac{\omega R}{v} \right)^4 \right)^{-1} \right]^{-1} N_p \quad (\text{eq. S16})$$

In above equations,  $\bar{V}$  is the average atomic volume,  $\bar{M}$  is the average atomic mass,  $\gamma$  is the Grüneisen parameter,  $A_N$  is the ratio between normal process and Umklapp phonon scattering.

#### 1.4 Calculation of quality factor $B$

The quality factor  $B$  of the  $\text{Ag}_{0.03}\text{Pb}_{1-x}\text{Mn}_x\text{Te}$  samples was calculated by:<sup>10</sup>

$$B = \left( \frac{k_B}{e} \right)^2 \frac{8\pi e (2m_e k_B T)^{3/2} \mu_W T}{3h^3 \kappa_{lat}} \quad (\text{eq. S17})$$

## 2. Supplementary Figures

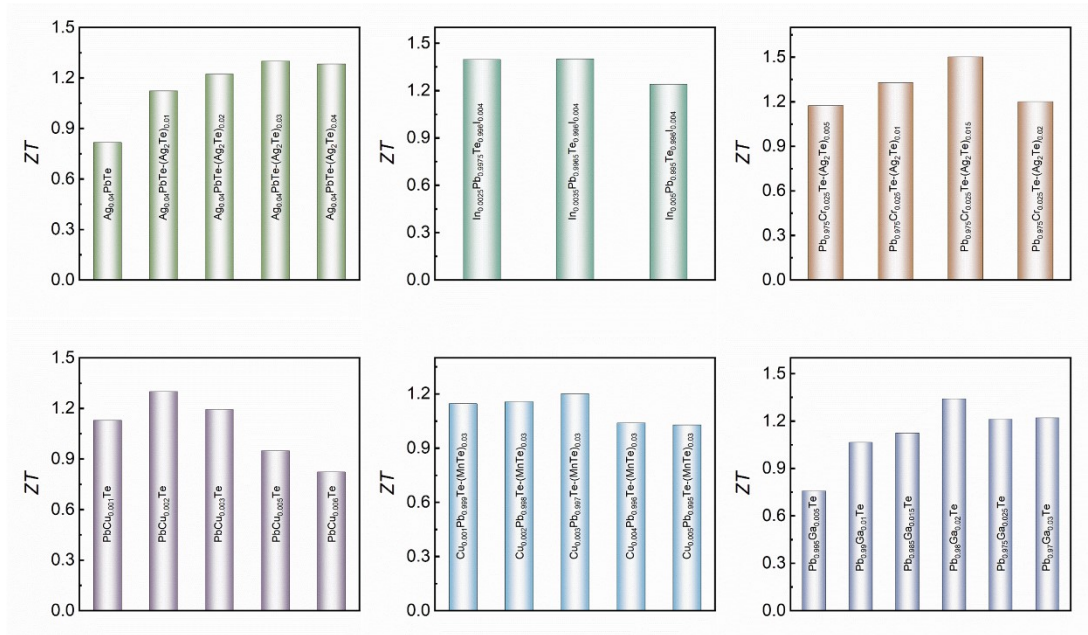

**Figure S1.** ZT of the main components of dynamic doped PbTe systems.<sup>11-16</sup>

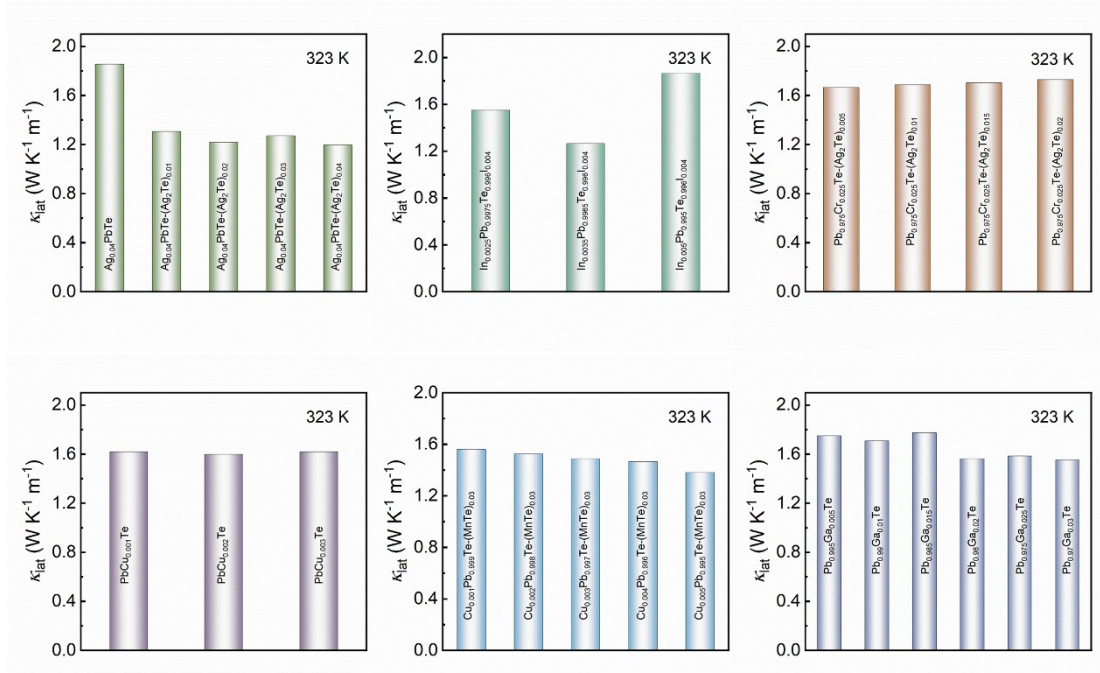

**Figure S2.**  $\kappa_{\text{lat}}$  at 323 K of the main components of dynamic doped PbTe systems.<sup>11-16</sup> the Lorenz number calculation methods for representative samples of each system: single parabolic band (SPB) model: PbTe:Cr/Ag<sub>2</sub>Te, PbTe:Ag, PbTe:Cu/MnTe, PbTe:Ga; single Kane band (SKB) model: PbTe:In/I, PbTe:Cu.

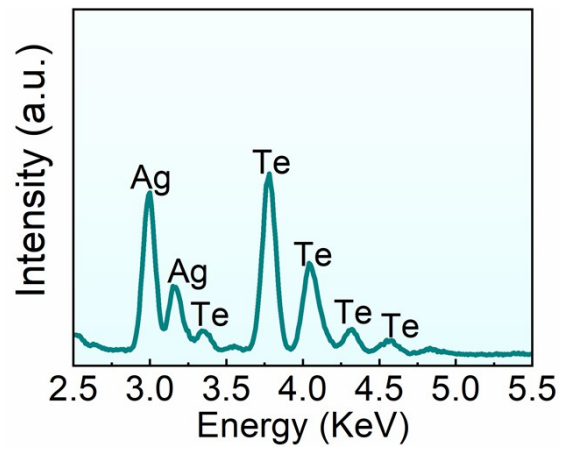

**Figure S3.** EDS spectra obtained from  $\text{Ag}_2\text{Te}$  secondary phase.

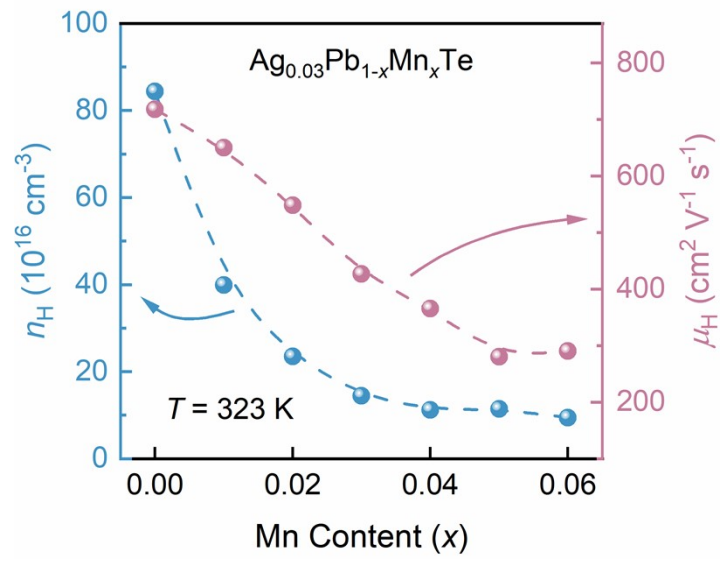

**Figure S4.** The Hall carrier concentration  $n_H$  and the Hall carrier mobility  $\mu_H$  as a function of  $x$  in  $\text{Ag}_{0.03}\text{Pb}_{1-x}\text{Mn}_x\text{Te}$ .



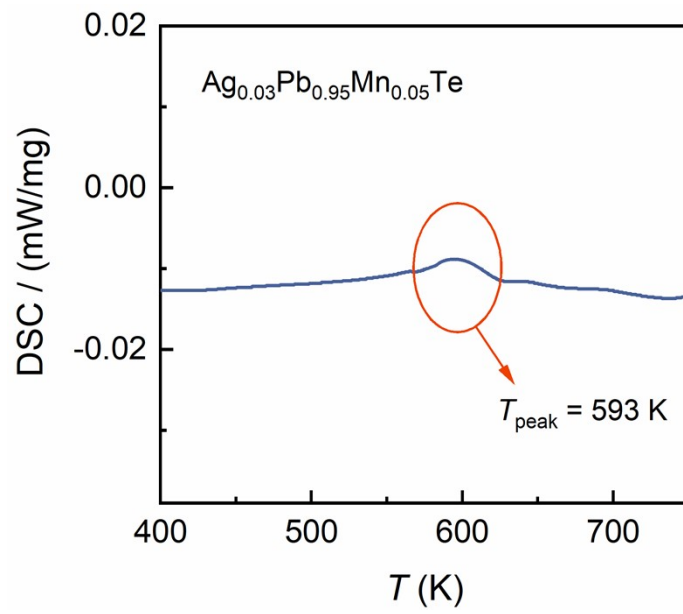

**Figure S5.** DSC curve of  $\text{Ag}_{0.03}\text{Pb}_{0.95}\text{Mn}_{0.05}\text{Te}$ , and the peak occurs at 593 K

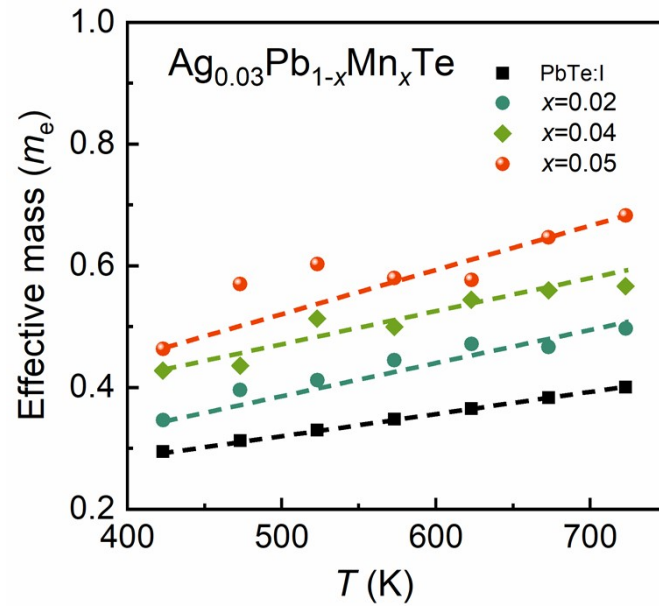

**Figure S6.** Temperature-dependent effective masses  $m^*$  of  $\text{PbTe}$  and  $\text{Ag}_{0.03}\text{Pb}_{1-x}\text{Mn}_x\text{Te}$  ( $x = 0.02, 0.04, 0.05$ ), the black scatter values are from the reported I doped  $\text{PbTe}$  material.<sup>6</sup>

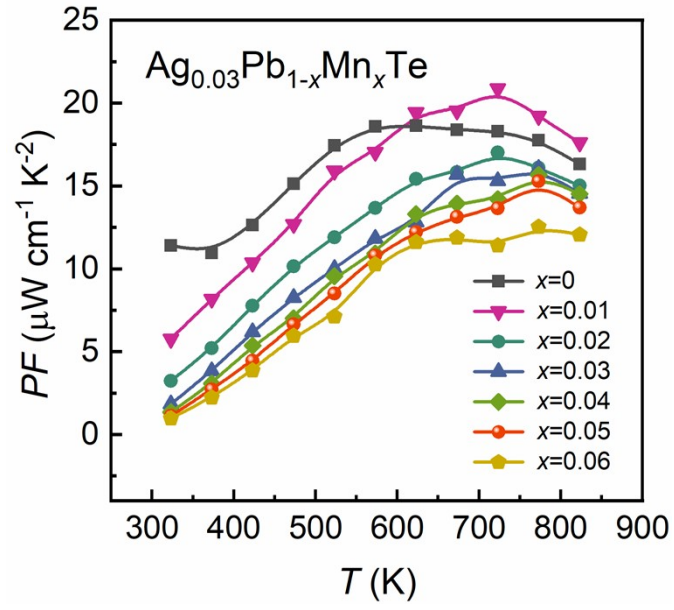

**Figure S7.** Temperature-dependent power factor  $PF$  for  $n$ -type  $\text{Ag}_{0.03}\text{Pb}_{1-x}\text{Mn}_x\text{Te}$  samples.

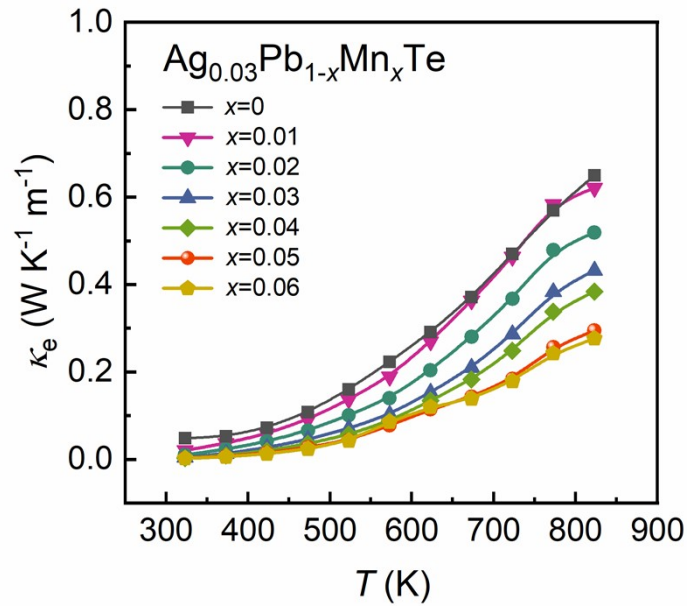

**Figure S8.** Temperature-dependent electrical thermal conductivity  $\kappa_e$  for *n*-type  $\text{Ag}_{0.03}\text{Pb}_{1-x}\text{Mn}_x\text{Te}$  samples.

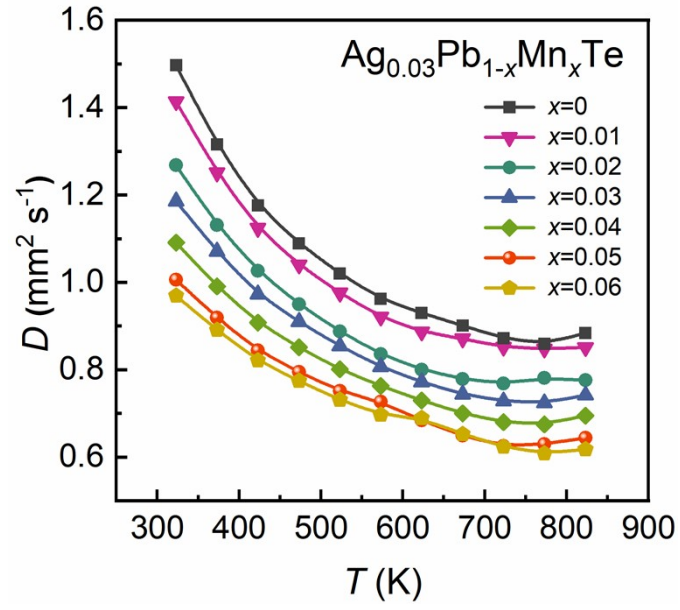

**Figure S9.** Temperature-dependent thermal diffusivity ( $D$ ) for  $n$ -type  $\text{Ag}_{0.03}\text{Pb}_{1-x}\text{Mn}_x\text{Te}$  samples.

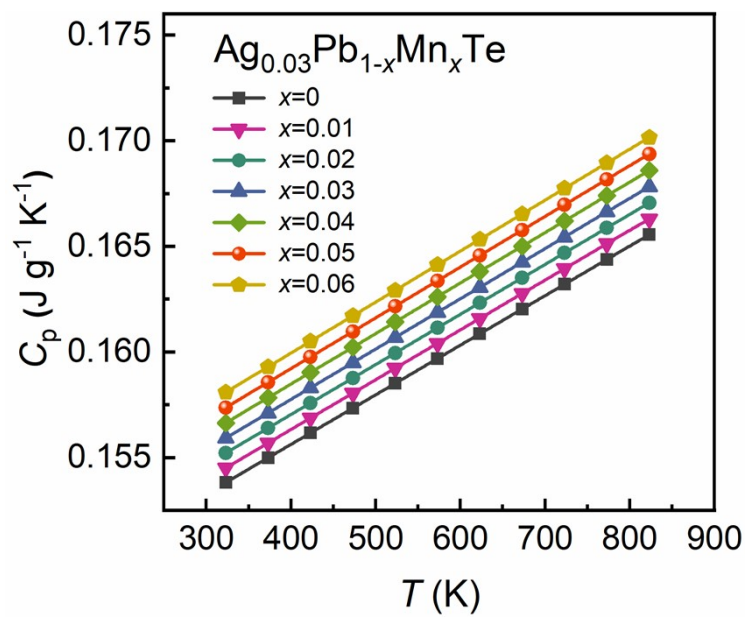

**Figure S10.** Temperature-dependent heat capacity ( $C_p$ ) for  $n$ -type  $\text{Ag}_{0.03}\text{Pb}_{1-x}\text{Mn}_x\text{Te}$  samples.

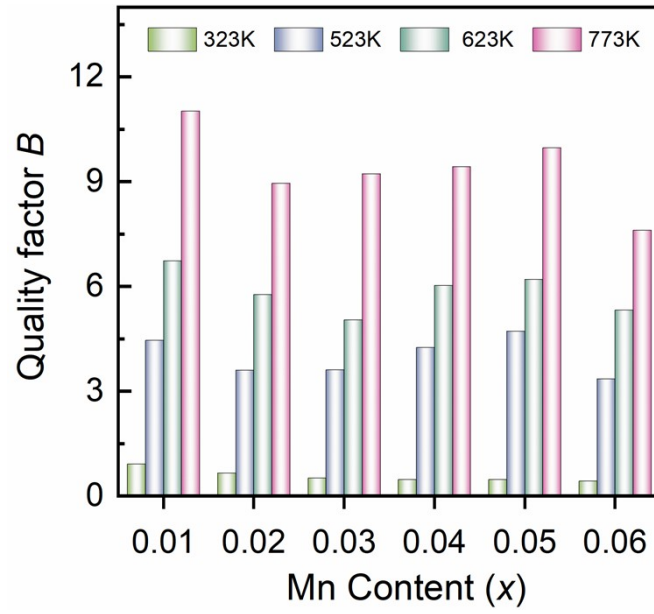

**Figure S11.** The calculated quality factor  $B$  at 323 K, 523 K, 623 K and 773 K for  $n$ -type  $\text{Ag}_{0.03}\text{Pb}_{1-x}\text{Mn}_x\text{Te}$  samples.

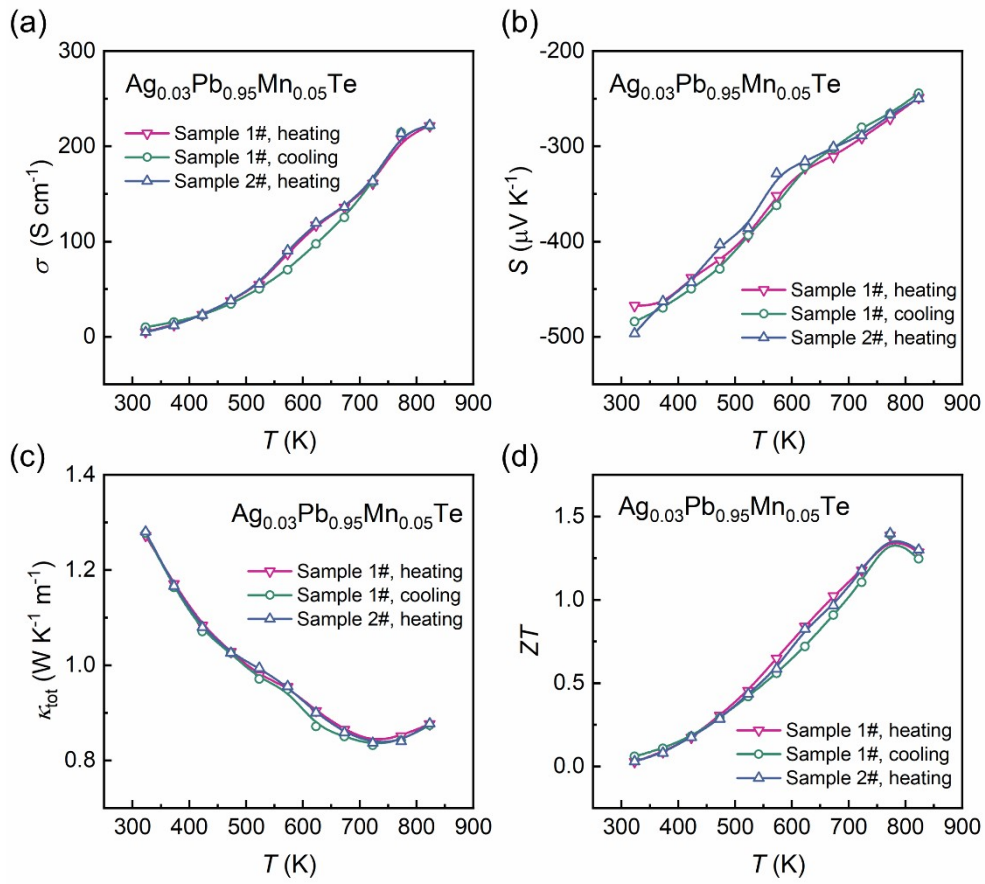

**Figure S12.** Thermal stability and reproducibility of (a) electrical conductivity  $\sigma$ , (b) Seebeck coefficient  $S$ , (c) total thermal conductivity  $\kappa_{\text{tot}}$ , and (d) figure of merit  $ZT$  for the high-performance  $n$ -type  $\text{Ag}_{0.03}\text{Pb}_{0.95}\text{Mn}_{0.05}\text{Te}$  sample.



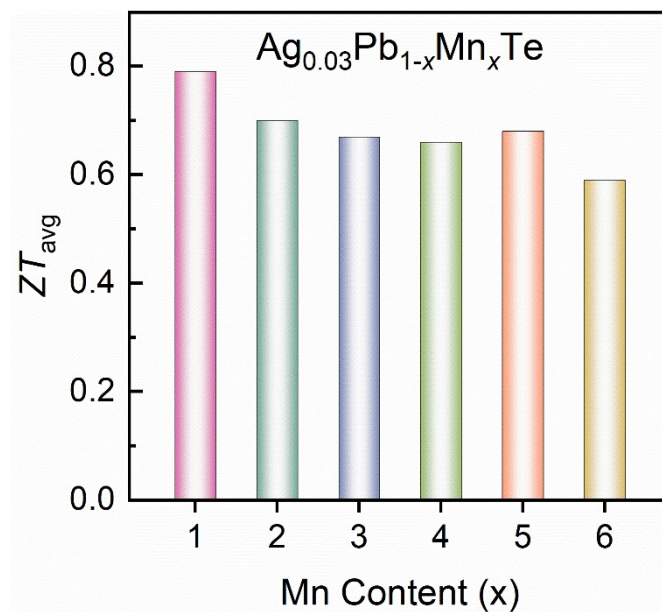

**Figure S13.** The average  $ZT$  ( $ZT_{avg}$ ) for  $Ag_{0.03}Pb_{1-x}Mn_xTe$  samples.

### 3. Supplementary tables

**Table S1.** The sample densities of  $\text{Ag}_{0.03}\text{Pb}_{1-x}\text{Mn}_x\text{Te}$  ( $x = 0, 0.01, 0.02, 0.03, 0.04, 0.05, 0.06$ ) measured by Archimedes method.

| Sample No. | Measured density ( $\text{g cm}^{-3}$ ) | Relative density (%) |
|------------|-----------------------------------------|----------------------|
| $x=0$      | 8.17                                    | 99.15                |
| $x=0.01$   | 8.099                                   | 98.29                |
| $x=0.02$   | 8.098                                   | 98.28                |
| $x=0.03$   | 8.003                                   | 97.12                |
| $x=0.04$   | 8.087                                   | 98.14                |
| $x=0.05$   | 8.037                                   | 97.53                |
| $x=0.06$   | 8.167                                   | 99.11                |

**Table S2.** The input parameters based on the theoretical simulation of lattice thermal conductivity in this work.

| Parameters                   | Symbol           | Value                  | Ref. |
|------------------------------|------------------|------------------------|------|
| Gruneisen parameter          | $\gamma$         | 1.65                   | 3    |
| Debye temperature            | $\theta_D$ (K)   | 163                    | 17   |
| Average sound velocity       | $v$ (m/s)        | 1720                   | 17   |
| Average atomic mass for PbTe | $M$ (kg)         | $2.78 \times 10^{-25}$ | 18   |
| Ratio of N- to U- process    | $A_N$            | 2.9                    | 19   |
| Phenomenological parameter   |                  | 65                     | 18   |
| Mole mass of Pb              | $M_{Pb}$ (g/mol) | 207.2                  | -    |
| Mole mass of Te              | $M_{Te}$ (g/mol) | 127.6                  | -    |
| Mole mass of Ag              | $M_{Ag}$ (g/mol) | 107.8682               | -    |
| Mole mass of Mn              | $M_{Mn}$ (g/mol) | 54.938                 | -    |
| Radius of Pb atom            | $r_{Pb}$ (Å)     | 1.2                    | -    |
| Radius of Ag atom            | $r_{Ag}$ (Å)     | 1.26                   | -    |
| Radius of Mn atom            | $r_{Mn}$ (Å)     | 0.8                    | -    |

## References

- 1 H. J. Wu, C. Chang, D. Feng, Y. Xiao, X. Zhang, Y. L. Pei, L. Zheng, D. Wu, S. K. Gong, Y. Chen, J. Q. He, M. G. Kanatzidis and L. D. Zhao, *Energy Environ. Sci.*, 2015, **8**, 3298-3312.
- 2 Y. I. Ravich, B. A. Efimova and V. I. Tamarchenko, *Phys. Status Solidi B.*, 1971, **43**, 11-33.
- 3 Y. I. Ravich, B. A. Efimova, I. A. Smirnov and L. S. Stil'bans, *Semiconducting Lead Chalcogenides*, Plenum Press, New York, 1970.
- 4 R. S. Allgaier, *J. Appl. Phys.*, 1961, **32**, 2185-2189.
- 5 H. A. Lyden, *Phys. Rev.*, 1964, **135**, A514-A521.
- 6 Y. Z. Pei, A. D. LaLonde, H. Wang and G. J. Snyder, *Energy Environ. Sci.*, 2012, **5**, 7963-7969.
- 7 Y. I. Ravich, B. A. Efimova and V. I. Tamarchenko, *Phys. Status Solidi B.*, 1971, **43**, 453-469.
- 8 Y. Z. Pei, Z. M. Gibbs, A. Gloskovskii, B. Balke, W. G. Zeier and G. J. Snyder, *Adv. Energy Mater.*, 2014, **4**, 12.
- 9 J. Callaway and H. C. Vonbaeyer, *Phys. Rev. Lett.*, 1960, **5**, 223-223.
- 10 G. J. Snyder, A. H. Snyder, M. Wood, R. Gurunathan, B. H. Snyder and C. N. Niu, *Adv. Mater.*, 2020, **32**, 5.
- 11 Y. Z. Pei, A. F. May and G. J. Snyder, *Adv. Energy Mater.*, 2011, **1**, 291-296.
- 12 Q. Zhang, Q. C. Song, X. Y. Wang, J. Y. Sun, Q. Zhu, K. Dahal, X. Lin, F. Cao, J. W. Zhou, S. Chen, G. Chen, J. Mao and Z. F. Ren, *Energy Environ. Sci.*, 2018, **11**, 933-940.
- 13 H. T. Liu, Q. Sun, Y. Zhong, Q. Deng, L. Gan, F. L. Lv, X. L. Shi, Z. G. Chen and R. Ang, *Nano Energy*, 2022, **91**, 106706.
- 14 L. You, J. Y. Zhang, S. S. Pan, Y. Jiang, K. Wang, J. Yang, Y. Z. Pei, Q. Zhu, M. T. Agne, G. J. Snyder, Z. F. Ren, W. Q. Zhang and J. Luo, *Energy Environ. Sci.*, 2019, **12**, 3089-3098.
- 15 Y. Zhong, H. T. Liu, Q. Deng, F. L. Lv, L. Gan and R. Ang, *ACS Appl. Mater. Interfaces*, 2021, **13**, 52802-52810.
- 16 X. L. Su, S. Q. Hao, T. P. Bailey, S. Wang, I. Hadar, G. J. Tan, T. B. Song, Q. J. Zhang, C. Uher, C. Wolverton, X. F. Tang and M. G. Kanatzidis, *Adv. Energy Mater.*, 2018, **8**, 11.
- 17 Y. Xiao, H. J. Wu, J. Cui, D. Y. Wang, L. W. Fu, Y. Zhang, Y. Chen, J. Q. He, S. J. Pennycook and L. D. Zhao, *Energy Environ. Sci.*, 2018, **11**, 2486-2495.
- 18 Z. S. Wang, H. He, X. D. Cui, H. T. Liu, W. B. Qiu, L. Q. Chen, B. Q. Zhou, J. Tang and R. Ang, *J. Appl. Phys.*, 2019, **125**, 6.
- 19 L. W. Fu, M. J. Yin, D. Wu, W. Li, D. Feng, L. Huang and J. Q. He, *Energy Environ. Sci.*, 2017, **10**, 2030-2040.
